# Supplementary material
Source: Springer Nature journal article supplement (https://www.springermedizin.de/resource/supplementary/13058_2012_3596_MOESM16_ESM.pdf/9703912)

(i)

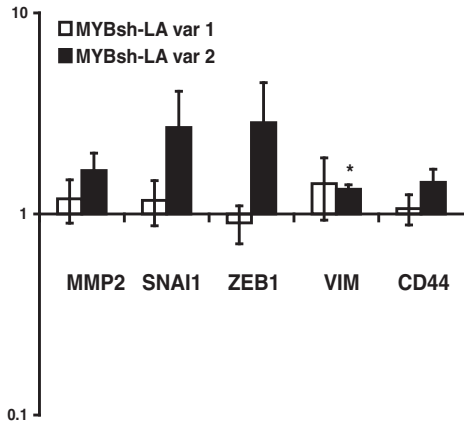

(ii)

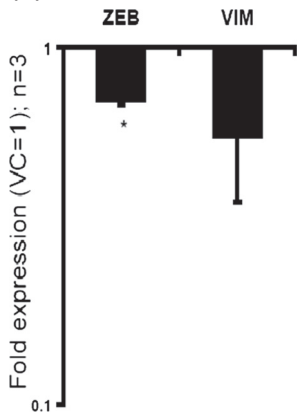

Supplement: MOESM16 [file 9703912]
